# Supplementary material
Source: publisher figshare collection journal article supplement (https://sage.figshare.com/ndownloader/files/20066168)
Supplement: Supplementary file 1 [file 20066168]

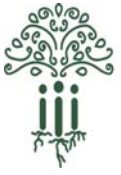

## **Interview Guide/Questionnaire – Identification of Bird Market Survey**

### Introduction and Consent of the Respondent

Has permission been given? 1. Yes, 2. No.    Signature and Date ...../..../....

### **A. Level of Bird Trade**

Store Name :

Address of Store :

Coordinates/GPS :

### **B. Respondent Identity**

Sex : Male....      Female....

Name :

Age :

Religion :

Race :

Marital Status :

Education Level :

No Schooling/ Not Graduated :

Job :

Phone Number :

### **C. Questions**

1. What is your average monthly income (IDR)?

a. 500.001-1.000.000

- b. 1.000.001-2.000.000
  - c. 2.000.001-3.000.000
  - d. More than 3.000.000
2. Have long have you been buying and selling birds?
  3. Why did you start selling birds?
  4. Do you think selling birds has been a profitable business for you? Why?
  5. Do you sell other types of animals besides birds in your store?
  6. Is this your only business/source of income?
  7. What did you do before selling birds?
  8. If you didn't sell birds, what other business would you like to have? Why?
  9. How many birds do you sell per week?
  10. How many birds do you sell per month?
  11. What is the most frequently sold bird species?
  12. What is the most sought-after bird species?

#### **D. Summary of Interviews**

*Note: it is always important to summarize the results of interview recordings because interviews may provide additional information that is not requested in the original question, which may be of interest to the project.*

#### **E. Observations**

*(Every observation or detail of the interviewer is taken into consideration for the project. For example: SITU/SIUP permission, owner's attitude, size of the store, how many customers, etc.)*



- a. *Licensing SITU/ SIUP*
  - *SITU, SIUP*
  - *SITU*
  - *SIUP*
  - *None*
  
- b. *Attitude of owner when interviewed*
  - *Open, Welcoming*
  - *Closed, Reserved*
  
- c. *Owner's attitude towards changing businesses*
  - *Positive*
  - *Negative*
  
- d. *Store condition*
  - *Large and permanent*
  - *Large and non-permanent*
  - *Small and permanent*
  - *Small and non-permanent*
  - *Traveling Merchant*
  
- e. *Number of people serving in the store*
  - *1*

- 2
- 3
- 4
- >4

f. *Number of customers present during the survey*

- 1
- 2
- 3
- 4
- > 4, ....
